# Supplementary material for: Improvement of NOx uptake/release over Pd/Beta by propylene: shielding effect of intermediates on adsorbed NOx species
Source: Royal Society of Chemistry journal article supplement (doi:10.1039/d0cp06075e), 2021-01-01
Supplement: d0cp06075e1.pdf [file d0cp06075e1.pdf]

Supplementary Information for

**Improvement of NO<sub>x</sub> uptake/release over Pd/Beta by propylene: shielding effect  
of intermediates on adsorbed NO<sub>x</sub> species**

Chao Liu,<sup>a</sup> Jun Wang,<sup>a</sup> Zexiang Chen,<sup>a</sup> Jianqiang Wang<sup>a</sup> and Meiqing Shen<sup>\*abc</sup>

- a. Key Laboratory for Green Chemical Technology of State Education Ministry, School of Chemical Engineering & Technology, Tianjin University, Tianjin 300072, P. R. China.
- b. State Key Laboratory of Engines, Tianjin University, Tianjin 300072, P. R. China.
- c. Collaborative Innovation Centre of Chemical Science and Engineering (Tianjin), Tianjin 300072, P. R. China.

\*To Whom Correspondence should be addressed

E-mail: mqshen@tju.edu.cn

Phone: (+86) 22-27407002

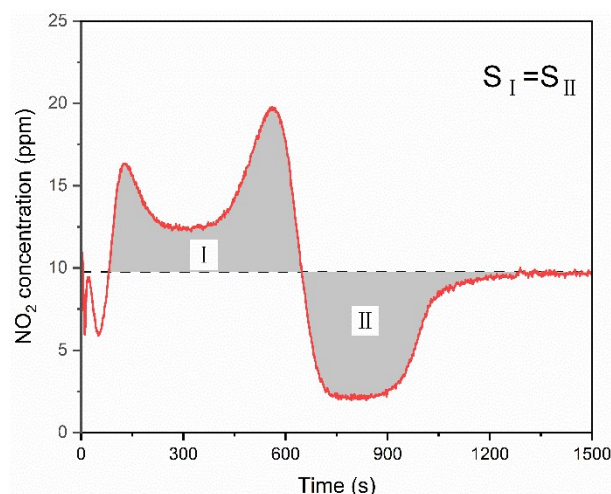

Fig. S1 NO<sub>2</sub> concentration curves of Pd/Beta during adsorption and the initial stage of desorption for a feed of 200 ppm NO<sub>x</sub>, 5% H<sub>2</sub>O, 10% O<sub>2</sub> and balance N<sub>2</sub>.

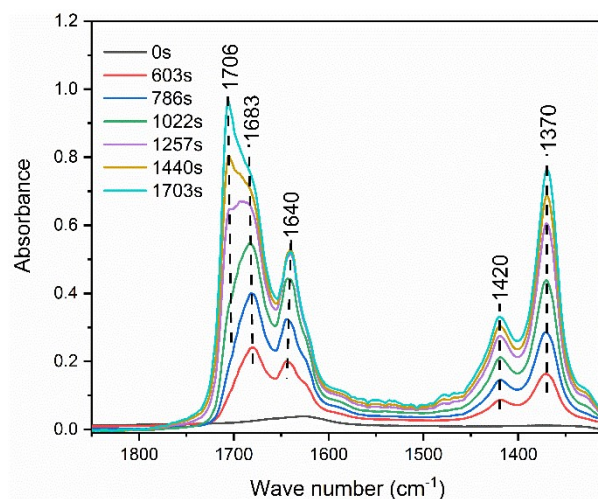

Fig. S2 In-situ FTIR spectra of Pd/Beta in a feed 400 ppm acetone and balance N<sub>2</sub>.

To verify the peak assignments, we conducted an in-situ FTIR experiment under a flow of acetone and N<sub>2</sub>, and the result was shown in Fig. S2. Two overlapping bands at 1683 cm<sup>-1</sup> and 1706 cm<sup>-1</sup> are assigned to C=O stretching mode of acetone molecules adsorbed on Pd species and silanol groups, respectively. There is no peak at 1706 cm<sup>-1</sup> in Fig. 5b due to the shielding effect of water on silanol. In addition, the peak at 1623 cm<sup>-1</sup> in Fig. 5b overlapped with the band at 1640 cm<sup>-1</sup>.

Table S1 The comparison of the experimental and calculated frequency of C=O in Pd-NC<sub>3</sub>H<sub>6</sub>O and acetone

|                                            | Experimental frequency of C=O | Calculated frequency of C=O |
|--------------------------------------------|-------------------------------|-----------------------------|
| C=O in Pd-NC <sub>3</sub> H <sub>6</sub> O | 1746 cm <sup>-1</sup>         | 1593 cm <sup>-1</sup>       |
| C=O in acetone                             | 1692 cm <sup>-1</sup>         | 1554 cm <sup>-1</sup>       |
| Difference                                 | 54 cm <sup>-1</sup>           | 39 cm <sup>-1</sup>         |
